# Supplementary material for: Antibacterial gluey silver–calcium phosphate composites for dentine remineralization
Source: Royal Society of Chemistry journal article supplement (doi:10.1039/c8tb00881g), 2018-01-01
Supplement: c8tb00881g1.pdf [file c8tb00881g1.pdf]

## Supporting Information

### **Antibacterial Gluey Silver-Calcium Phosphate Composite for Dentine Remineralization**

Yue-Qin Shen,<sup>a,b</sup> Ying-Jie Zhu<sup>\*,a,b</sup>, Fei-Fei Chen,<sup>a,b</sup> Ying-Ying Jiang,<sup>a,b</sup> Zhi-Chao  
Xiong,<sup>a</sup> and Feng Chen<sup>\*,a</sup>

<sup>a</sup> State Key Laboratory of High Performance Ceramics and Superfine Microstructure,  
Shanghai Institute of Ceramics, Chinese Academy of Sciences, Shanghai 200050,  
P. R. China

<sup>b</sup> University of Chinese Academy of Sciences, Beijing, 100049, P. R. China

\*Corresponding author:

E-mail: y.j.zhu@mail.sic.ac.cn; Phone: 0086-21-52412616; Fax: 0086-21-52413122

fchen@mail.sic.ac.cn

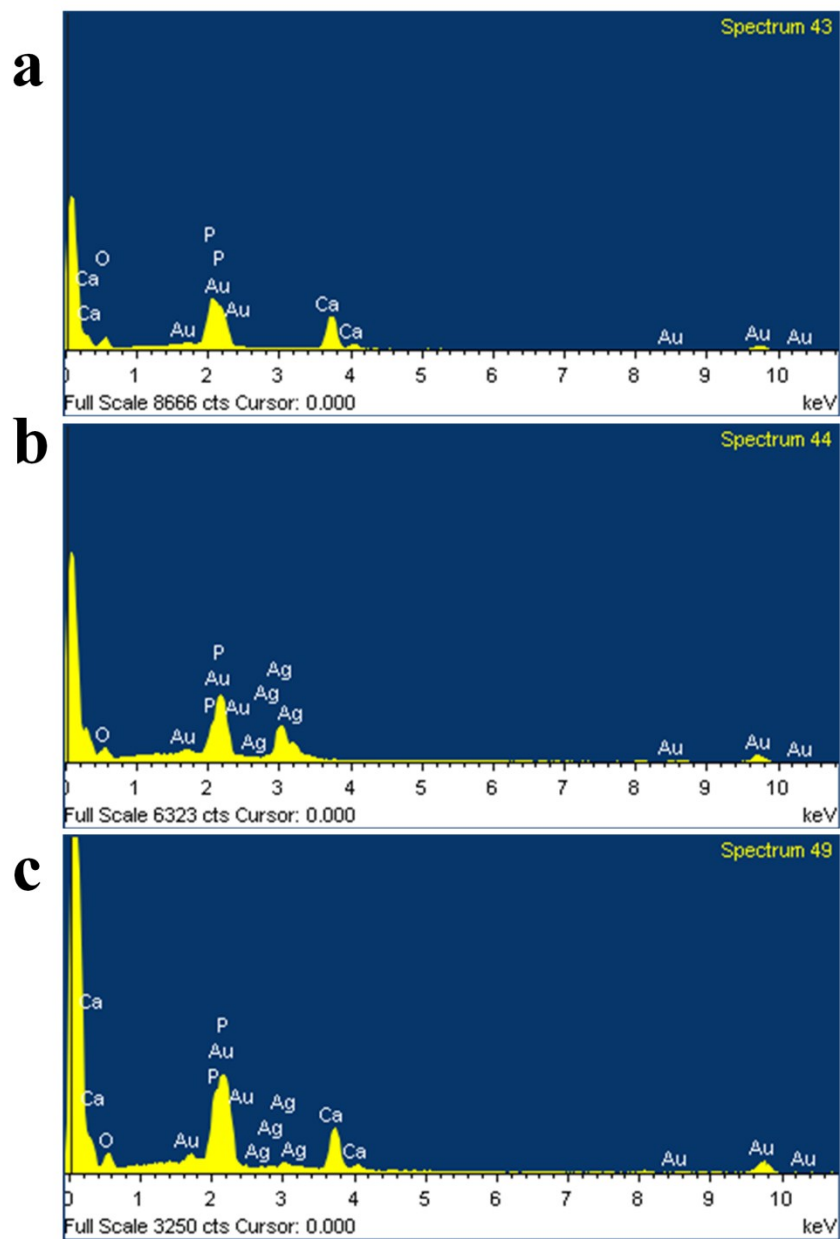

**Figure S1.** EDS patterns of the Ag-free sample (a), Ca-free sample (b) and GSCP-1 sample (c) synthesized using ATP as the phosphorus source by the rapid microwave-assisted solvothermal method at 120 °C for 10 min.

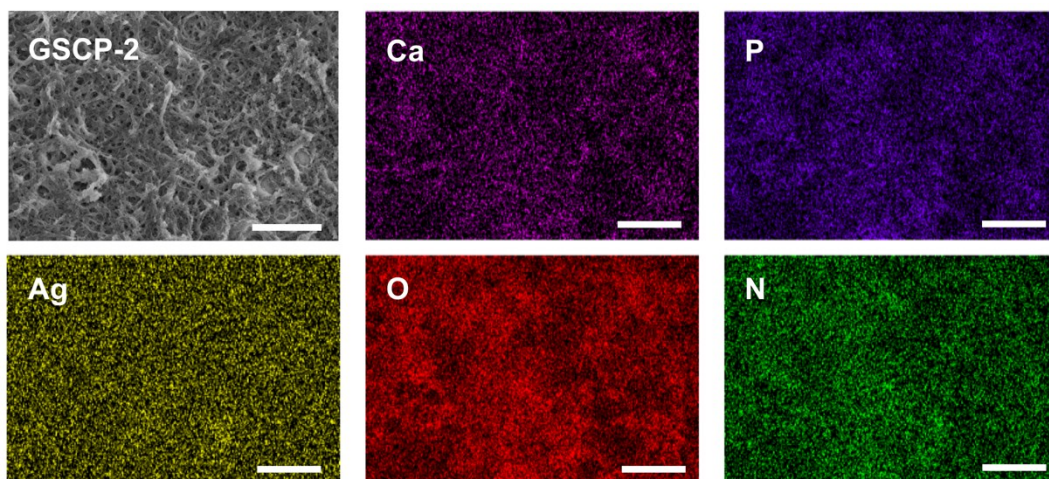

**Figure S2.** EDS elemental mappings of the GSCP-2 composite synthesized using ATP as the phosphorus source by the rapid microwave-assisted solvothermal method at 120 °C for 10 min. Scale bar is 500 nm.

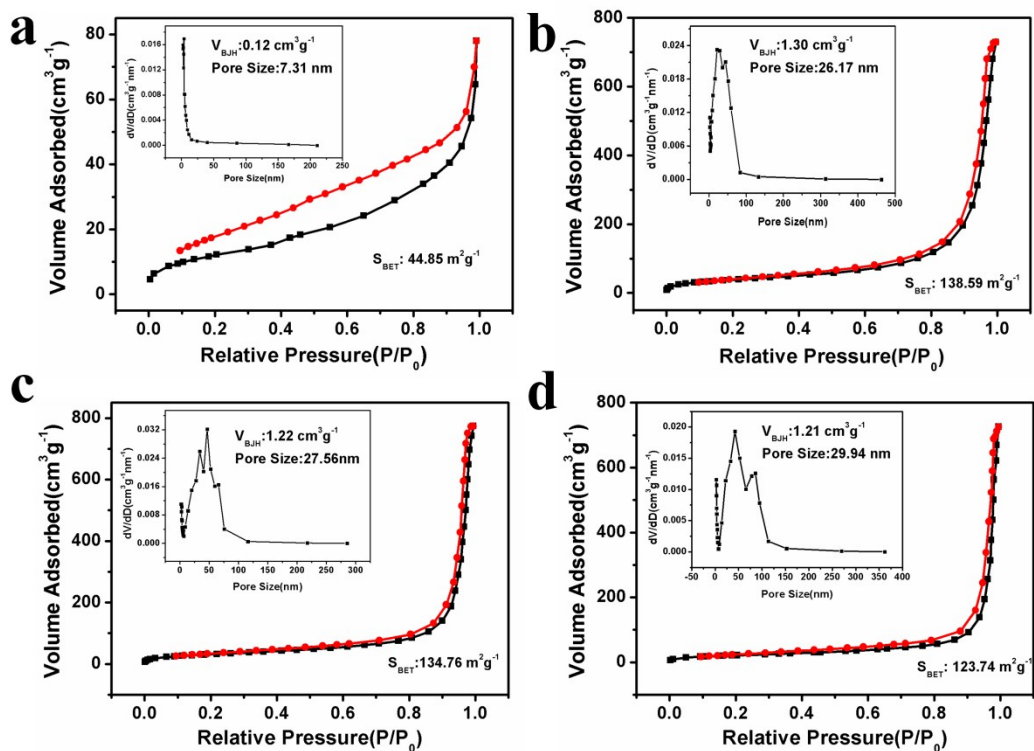

**Figure S3.** Nitrogen adsorption-desorption isotherm curves and pore size distribution curves (the insets) of the samples synthesized using ATP as the phosphorus source by the rapid microwave-assisted solvothermal method at 120 °C for 10 min. (a) Ag-free sample; (b) GSCP-1 sample; (c) GSCP-2 sample; (d) GSCP-3 sample.

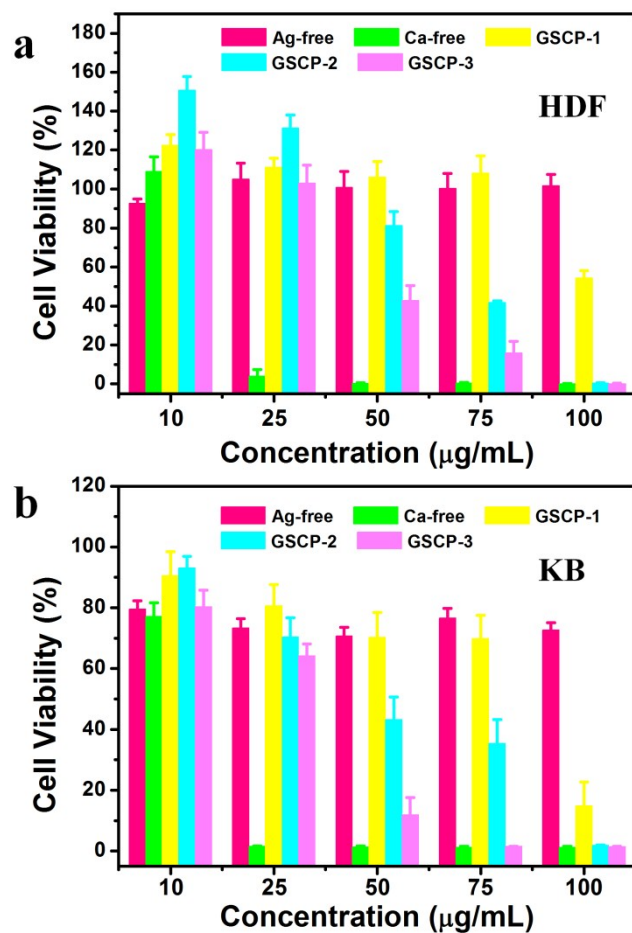

**Figure S4.** Cytotoxicity tests of the Ag-free sample, Ca-free sample and GSCP composite synthesized by the rapid microwave-assisted solvothermal method at 120 °C for 10 min using ATP as the phosphorus source. (a) HDF cells and (b) KB cells are used in the cytotoxicity tests.

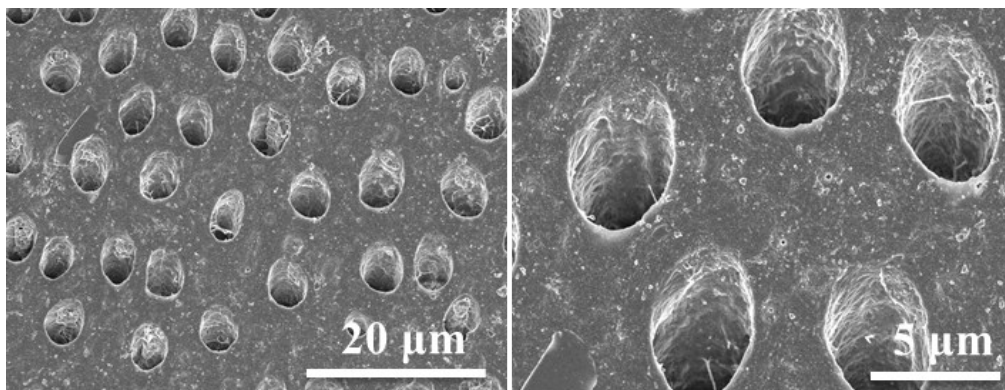

**Figure S5.** SEM micrographs of the cattle tooth dentine with exposed dentinal canaliculi.

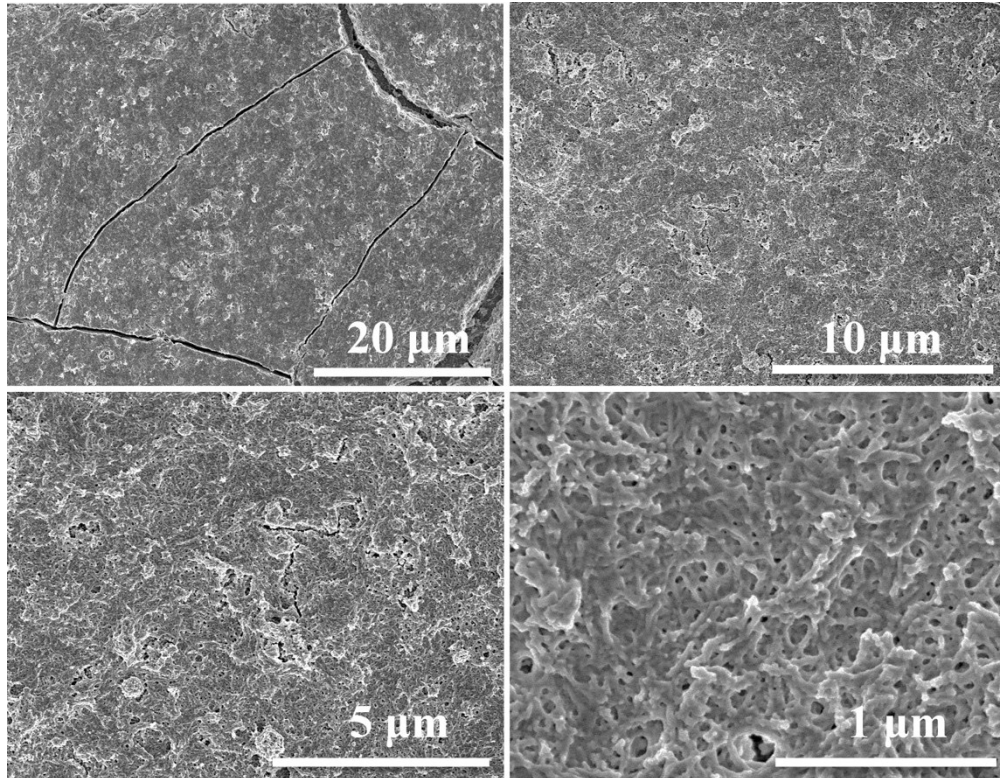

**Figure S6.** SEM micrographs of the cattle tooth dentine with exposed dentinal canaliculi with the GSCP-2 coating before being treated in the simulated saliva. The GSCP-2 composite displays a nanostructured meshwork constructed by one-dimensional fibers on the surface of the normal cattle tooth.

**Table S1.** The experimental parameters for the preparation of the samples using ATP as the phosphorus source by the rapid microwave-assisted solvothermal method at 120 °C for 10 min.

| Sample | Name    | Ca(NO <sub>3</sub> ) <sub>2</sub> ·4H <sub>2</sub> O (g) | AgNO <sub>3</sub> (g) <sup>[a]</sup> |
|--------|---------|----------------------------------------------------------|--------------------------------------|
| 1      | Ca-free | —                                                        | 0.020                                |
| 2      | Ag-free | 0.354                                                    | —                                    |
| 3      | —       | 0.354                                                    | 0.002                                |
| 4      | —       | 0.354                                                    | 0.004                                |
| 5      | —       | 0.354                                                    | 0.006                                |
| 6      | GSCP-1  | 0.354                                                    | 0.010                                |
| 7      | GSCP-2  | 0.354                                                    | 0.020                                |
| 8      | GSCP-3  | 0.354                                                    | 0.040                                |

<sup>[a]</sup> The amount of other reaction reagents is constant: ATP (0.330 g), urea (0.200 g), deionized water (15 mL), and ethylene glycol (15 mL).
